# Supplementary material
Source: HighWire-hosted journal article supplement (https://gh.bmj.com/content/4/1/e000860)
Supplement: inline-supplementary-material-1 [file inline-supplementary-material-1.pdf]

## Appendix

**Table A:** Factors that would improve implementation of digital aids in health care in Malawi: Themes, subthemes and example quotes

**Table B:** Positive and Negative Initial perceptions of NeoTree; Themes, subthemes & example quotes **and** recommendations for successful implementation of the NeoTree

**Table C:** Usability workshop themes and associated changes made

**Table A: Factors that would improve implementation of digital aids in health care in Malawi: Themes, subthemes and example quotes.**

| Subthemes                                        | Example Quotes                                                                                                                                                                                                                                                                                                                                                                                                                                                             |
|--------------------------------------------------|----------------------------------------------------------------------------------------------------------------------------------------------------------------------------------------------------------------------------------------------------------------------------------------------------------------------------------------------------------------------------------------------------------------------------------------------------------------------------|
| <b>Theme: Person dependent factors</b>           |                                                                                                                                                                                                                                                                                                                                                                                                                                                                            |
| Ability to update yourself                       | "we are not good at updating our self" [CO3]                                                                                                                                                                                                                                                                                                                                                                                                                               |
| familiarity with the system                      | "it all goes with who is that and how familiar you are with the system" [CO5]                                                                                                                                                                                                                                                                                                                                                                                              |
| positive attitude                                | "some people ... don't move with technology they are lacking behind... the best way how they operate, is just to be reserved, they just deny the thing that no, I cannot use it" CO3<br>"instead of saying teach me... they choose not to learn things" [N11]<br>"am not saying people should be difficult, expect the scene to come out." [CO3]<br>"belief is the extra work" [CO2]<br>"to be new to the algorithm digitally, so...you may think it's delaying you" [CO3] |
| empowerment                                      | "we need to empower those that are placed" [CO7]                                                                                                                                                                                                                                                                                                                                                                                                                           |
| <b>Theme: App dependent factors</b>              |                                                                                                                                                                                                                                                                                                                                                                                                                                                                            |
| responsive                                       | " it doesn't help up on the spot... the help or usage (should be) immediate"[CO2]                                                                                                                                                                                                                                                                                                                                                                                          |
| timely                                           | "now the print out has not been produced... if it's capable [of producing timely print out of data] then fine" [CO2]                                                                                                                                                                                                                                                                                                                                                       |
| <b>Theme: System / process dependent factors</b> |                                                                                                                                                                                                                                                                                                                                                                                                                                                                            |
| equitable access                                 | "if resources are there everyone should have it" [CO3]                                                                                                                                                                                                                                                                                                                                                                                                                     |
| sustainability                                   | "the other... is sustainability" [CO2]                                                                                                                                                                                                                                                                                                                                                                                                                                     |
| fast network                                     | "maybe the internet is slow or shutdown" [CO2]                                                                                                                                                                                                                                                                                                                                                                                                                             |
| maintenance team                                 | "there should be a team which look in to the functionality of the gadgets to see if it's working to the desired standards" [CO5]<br>"there are ... breakages, damages, or need for repair and takes time than now" [CO5]                                                                                                                                                                                                                                                   |
| ownership                                        | "what is needed is ownership" [CO2]<br>"responsibility to maintain should be left to an individual. Usually abuse comes in when it is not specifically given to an individual." [CO3]<br>"proper handover of the gadget. If we leave them like the ground phones, then we would have a problem" [CO2]                                                                                                                                                                      |
| security                                         | "I have fear of security" [CO3]<br>"maybe you can put a tracker on it [the tablet], an identification, that if it gets lost" [CO8]                                                                                                                                                                                                                                                                                                                                         |
| streamline process                               | "we have a lot of data tools to be completed... " [CO7]                                                                                                                                                                                                                                                                                                                                                                                                                    |
| proximity to clinical care                       | "they [data collection staff] should not just be in the office, but still they can be on the ground and do ABCD" [CO7]                                                                                                                                                                                                                                                                                                                                                     |
| integrate systems                                | "I think we should start with the health centres as well because there are times the babies story is not present" [CO9]                                                                                                                                                                                                                                                                                                                                                    |
| infection control                                | "I think infection prevention procedures need to be considered" [CO8]                                                                                                                                                                                                                                                                                                                                                                                                      |
| Resources                                        | "maybe should increase the number of [tablets]"[N7]                                                                                                                                                                                                                                                                                                                                                                                                                        |
| operating system                                 | "it should not allow installations of other apps, like WhatsApp, games, Zuma" [CO8]                                                                                                                                                                                                                                                                                                                                                                                        |
| device                                           | "I think it would be easier using a tablet [compared with a phone]" [CO6]                                                                                                                                                                                                                                                                                                                                                                                                  |
| <b>Theme: Community education (no subthemes)</b> |                                                                                                                                                                                                                                                                                                                                                                                                                                                                            |
|                                                  | "I think acceptance from the community" [CO8]                                                                                                                                                                                                                                                                                                                                                                                                                              |
|                                                  | "I think we should learn to explain...they [parents and guardians] will understand" [CO9]                                                                                                                                                                                                                                                                                                                                                                                  |
|                                                  | "before we introduce those things, we need to go on the media, radios, and TVs, and explain..." [CO7]                                                                                                                                                                                                                                                                                                                                                                      |

CO = clinical officer, N = Nurse

**Table B: Initial perceptions of NeoTree; Themes, subthemes & example quotes**

| Subthemes                                                                  | Example Quotes                                                                                                                                                                                                                                                                                                                                                                                                                                           |
|----------------------------------------------------------------------------|----------------------------------------------------------------------------------------------------------------------------------------------------------------------------------------------------------------------------------------------------------------------------------------------------------------------------------------------------------------------------------------------------------------------------------------------------------|
| <b>Theme: Positive perceptions</b>                                         |                                                                                                                                                                                                                                                                                                                                                                                                                                                          |
| confidence                                                                 | <i>"the app it gives the person the confidence... even I might not know but when I am on this app it will guide me and I will do the right thing" [CO2]</i>                                                                                                                                                                                                                                                                                              |
| guide                                                                      | <i>"it could be [a helpful diagnostic tool]" [CO2]</i><br><i>"if almost all the differentials that are coming out there more less like we didn't think of them at the first instance, I think it will ring an alarm to say, at least you have to familiarise yourself with other..." [CO3]</i><br><i>"at first it may be a problem but as we go along I think we might get used to it" [CO4]</i>                                                         |
| overall chances of success                                                 | <i>"it's [the NeoTree] a good idea" [almost all participants]</i><br><i>"it's going to succeed" [CO5]</i><br><i>"it will succeed" [N12]</i><br><i>"it's a very good idea, only that there is time you are just piloting so I think maybe you might not feel the goodness of it because it will have some hiccups but once its finalised I feel it will be a very good development" [CO8]</i><br><i>"[it will succeed] provided we are willing" [CO9]</i> |
| data collection function                                                   | <i>"if we strict ourselves to use, to correct use of the gadget, I think it would be a tool for data collection or monitoring" [CO3]</i><br><i>".. it's a good one because we have all the information there, important information, other using our old way, because we miss some of the information" [CO4]</i><br><i>"it will help ... data collection and training, but not diagnosis" [N7]</i>                                                       |
| training                                                                   | <i>"I think with that it could give the confidence... by using the app regularly you may get used and maybe sort of memorize even in a situation without an app you will remember that aah with these hypothermia I will do ABCD." [CO2]</i><br><i>"people will love it because it is a learning point" [CO2]</i>                                                                                                                                        |
| reduce waste                                                               | <i>"I think it will to solve these other problems of stationary" [CO8]</i>                                                                                                                                                                                                                                                                                                                                                                               |
| time saver                                                                 | <i>"I don't think it's a bad idea... it is time saving" [N14]</i>                                                                                                                                                                                                                                                                                                                                                                                        |
| <b>Theme: Negative perceptions</b>                                         |                                                                                                                                                                                                                                                                                                                                                                                                                                                          |
| conflict with protocols                                                    | <i>"sometimes because may be gloved and you are maybe touching the baby, so it wouldn't be ideal that you can take out the glove..." [CO2]</i>                                                                                                                                                                                                                                                                                                           |
| parental/ guardian perception                                              | <i>"looking at the guardian, they will think you are playing on the tablet" [CO4]</i>                                                                                                                                                                                                                                                                                                                                                                    |
| <b>Theme: Recommendations for successful implementation of the NeoTree</b> |                                                                                                                                                                                                                                                                                                                                                                                                                                                          |
| attitude                                                                   | <i>"it will start with us, if we have an interest in it, a positive attitude, it's going to succeed." [CO4]</i>                                                                                                                                                                                                                                                                                                                                          |
| Back-up power to printer                                                   | <i>"I don't know for the power... because now we are experiencing blackouts"</i>                                                                                                                                                                                                                                                                                                                                                                         |
| leadership                                                                 | <i>"it will be put in the hands of the in charge, who will foresee the functioning and management of this thing" [CO3]</i>                                                                                                                                                                                                                                                                                                                               |
| teamwork                                                                   | <i>"why should it succeed if empowered to only one person" [CO3]</i><br><i>"if they are like trained on how to use that tablet, it will be easy" [N7]</i><br><i>"we need trainings" [N1]</i>                                                                                                                                                                                                                                                             |
| training                                                                   | <i>"it you don't know how to operate it will delay management of the kid" [N4]</i><br><i>"a single training, I don't think will change our mind to start... we should continue reminding each other..." [CO8]</i>                                                                                                                                                                                                                                        |
| ensure fast system                                                         | <i>"when you are using electronics and it takes forever people will opt for the manual [system]" [N7]</i>                                                                                                                                                                                                                                                                                                                                                |

CO = clinical officer, N = Nurse

**Table C: Usability workshop themes and associated changes made**

| Theme/tag                  | Feedback                                                                                                                                                                                                                                                                                  | Change                                                                                                                                                                                                                                                        |
|----------------------------|-------------------------------------------------------------------------------------------------------------------------------------------------------------------------------------------------------------------------------------------------------------------------------------------|---------------------------------------------------------------------------------------------------------------------------------------------------------------------------------------------------------------------------------------------------------------|
| Type of question           | Yes/No check-lists confusing as some questions became double negatives                                                                                                                                                                                                                    | Check-lists changes to single choice lists for <ul style="list-style-type: none"> <li>ANC care</li> <li>TTV doses</li> <li>Musculoskeletal problems</li> </ul>                                                                                                |
|                            | Didn't appreciate they could pick more than one answer                                                                                                                                                                                                                                    | Added clear instructions on difference between single choice list and multiple-choice lists                                                                                                                                                                   |
| Sequence of fields         | Sequence of family history section difficult & time consuming to complete                                                                                                                                                                                                                 | Remove family history section from application for now                                                                                                                                                                                                        |
| Language                   | Confusing words included:<br>'soft abdomen'<br>'head bobbing'<br>'tracheal tug'<br><br>'dysmorphic'<br>'> 3 secs'<br>'RDS'                                                                                                                                                                | Changed to 'soft and normal'<br>Changed to 'head-nodding'<br>One HCW didn't understand this term but all others did so not changed<br>Changed to 'abnormal facial features'<br>Changed to 'more than 3 seconds'<br>Written as 'respiratory distress syndrome' |
| Completing fields          | Tried to enter APGARs out of 10                                                                                                                                                                                                                                                           | 'Out of 10' added to APGARs question                                                                                                                                                                                                                          |
| Using timer                | Clicked away from timer                                                                                                                                                                                                                                                                   | Specific 'tap-area' added                                                                                                                                                                                                                                     |
| Understanding instructions | <ul style="list-style-type: none"> <li>Usually measures capillary refill time peripherally</li> <li>Didn't understand 'crease' in instruction for feeling femoral pulses</li> <li>Don't usually check pupils, pen-torch not available</li> <li>Not confident using stethoscope</li> </ul> | Changed CRT to peripheral (later changed back to central and picture added)                                                                                                                                                                                   |
|                            |                                                                                                                                                                                                                                                                                           | Picture added                                                                                                                                                                                                                                                 |
|                            |                                                                                                                                                                                                                                                                                           | Pupillary examination removed                                                                                                                                                                                                                                 |
| Length of question         | Long button labels for feeding question, took a long time to read all options                                                                                                                                                                                                             | Buttons labels made more concise                                                                                                                                                                                                                              |
| Information not available  | Unknown option needed                                                                                                                                                                                                                                                                     | Option added to just click 'no' if unsure<br>Unknown option added for ANC visits etc.                                                                                                                                                                         |
| Proceeding through the app | Tried to click on question text rather than answer line.                                                                                                                                                                                                                                  | Clearer instructions on how to proceed through the app at the beginning                                                                                                                                                                                       |
|                            | Apgars not available- couldn't proceed                                                                                                                                                                                                                                                    | Field validation changed to optional to account for out-born babies referred with no apgars available<br>Extra question added – 'Did the baby cry at delivery?'                                                                                               |
| Navigation                 | Navigation pages were well understood<br>Occasional clicks on the navigation bar were attempted                                                                                                                                                                                           | Consider removing these as add time, but with practice they will be better appreciated                                                                                                                                                                        |
| Drop-down menus            | <ul style="list-style-type: none"> <li>Religion</li> <li>Health facility</li> <li>Cadre</li> </ul>                                                                                                                                                                                        | <ul style="list-style-type: none"> <li>Specific Malawi denominations added</li> <li>All nearby health centres added</li> <li>Community NMT / technical officer added</li> </ul>                                                                               |

ANC = Antenatal care, TTV = Tetanus toxoid vaccine, secs = seconds, RDS = respiratory distress syndrome, CRT = capillary refill time, NMT = nurse midwife technician
